# Supplementary material
Source: Springer Nature journal article supplement (https://www.springermedizin.de/resource/supplementary/12913_2006_245_MOESM1_ESM.pdf/9534684)

Standard normal distribution:  
The shaded areas indicate the two-sided p-value

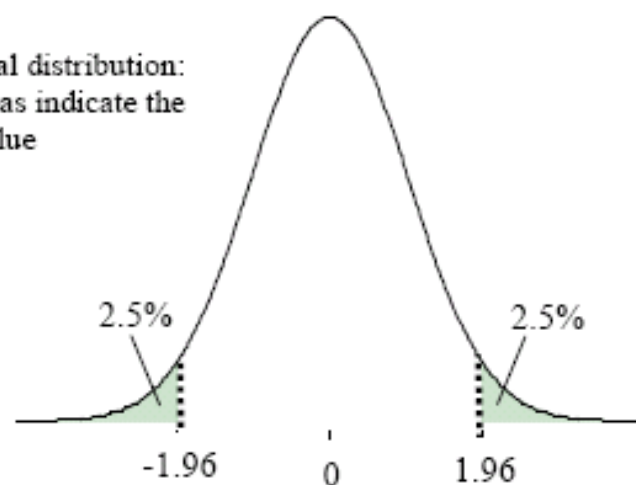

Coefficient distribution if  $b_1 > 0$ :  
The unshaded area (i.e., one minus the 1-sided p-value) indicates the probability that new treatment is cost-effective (i.e., that the incremental net benefit  $> 0$ )

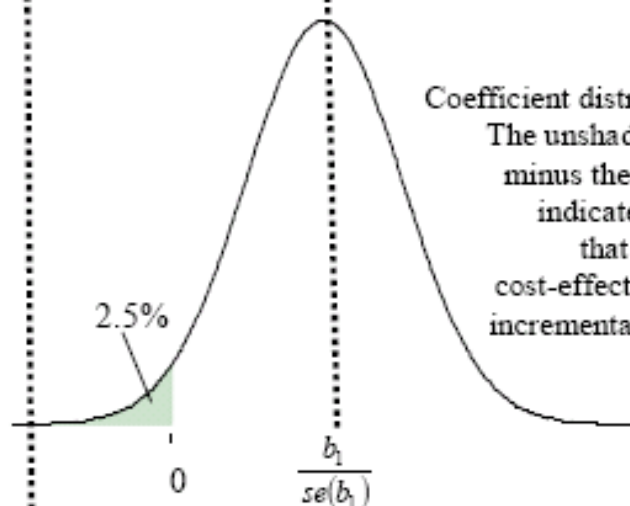

Coefficient distribution if  $b_1 < 0$ :  
The shaded area (i.e., the 1-sided p-value) indicates the probability that new treatment is cost-effective (i.e., that the incremental net benefit  $> 0$ )

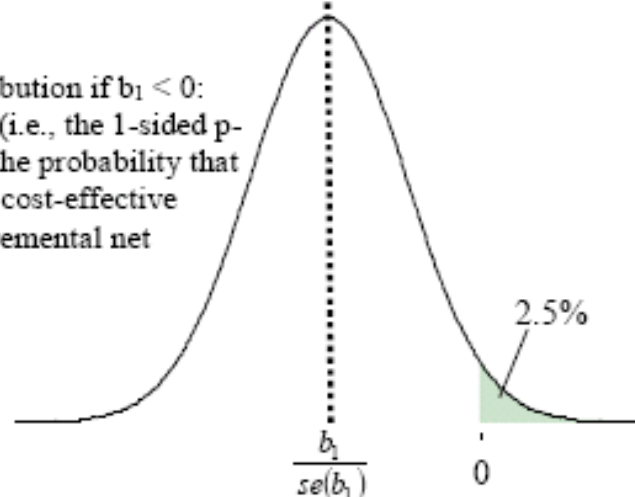

Supplement: MOESM1 [file 9534684]
